# Supplementary material for: Use of Ionic Liquids and Co-Solvents for Synthesis of Thin-Film Composite Membranes
Source: MDPI journal article supplement (doi:10.3390/membranes11040297), 2021-04-20
Supplement: s1 [file s1]

# Supporting Information: Use of Ionic Liquids and Co-Solvents for Synthesis of Thin-Film Composite Membranes

Peter-Renaat Van den Mooter \*, Liridona Dedvukaj and Ivo F. J. Vankelecom \*

Membrane Technology Group (MTG)—Division cMACS—Faculty of Bioscience Engineering KU Leuven, Celestijnenlaan 200F, Box 2454, 3001 Leuven, Belgium; peter.vandenmooter1@kuleuven.be  
 \*Correspondence: [peter.vandenmooter@kuleuven.be](mailto:peter.vandenmooter@kuleuven.be) (P.-R.VdM.); [ivo.vankelecom@kuleuven.be](mailto:ivo.vankelecom@kuleuven.be) (I.F.J.V.); Tel.: +32-16329207 (P.-R.V.d.M.); +32-16321594 (I.F.J.V.)

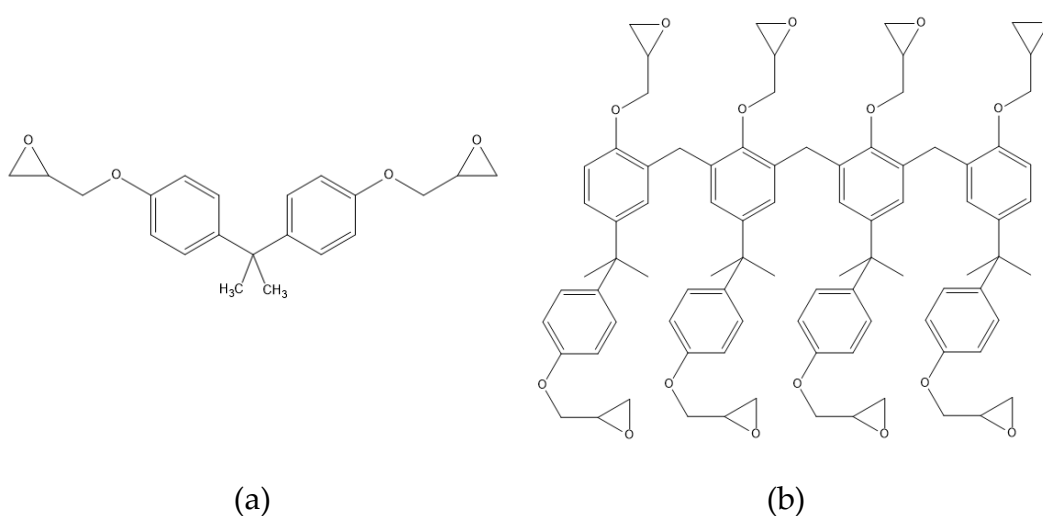

**Figure S1.** Structure of (a) BADGE and (b) EPON™ Resin SU-8.

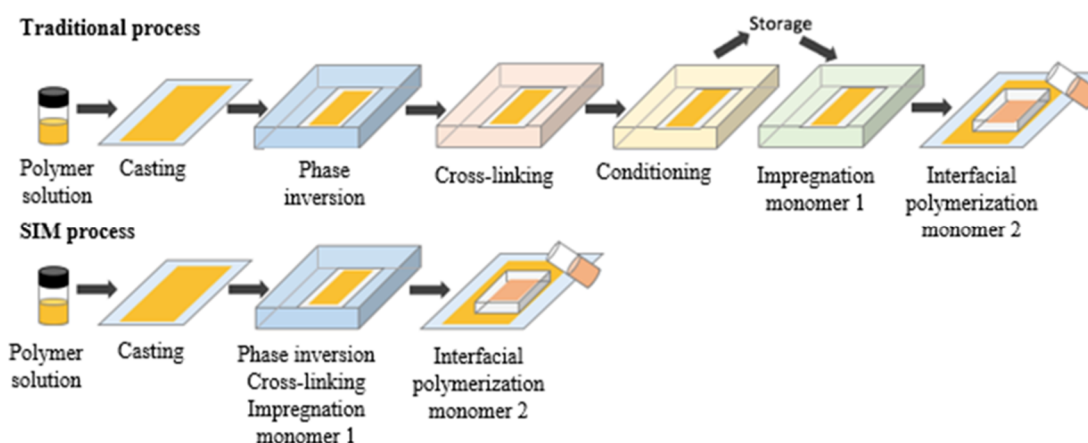

**Figure S2.** The traditional process compared to the SIM method for the synthesis of cross-linked TFC membranes based on a PI support. For PSU, cross-linking is not included (adapted from [1,2])

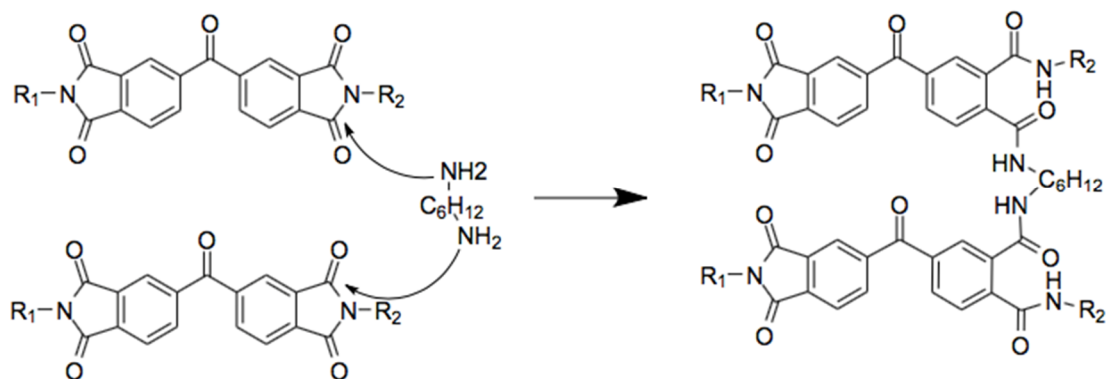

**Figure S3.** Reaction to cross-link PI with HDA (adapted from [3,4]).

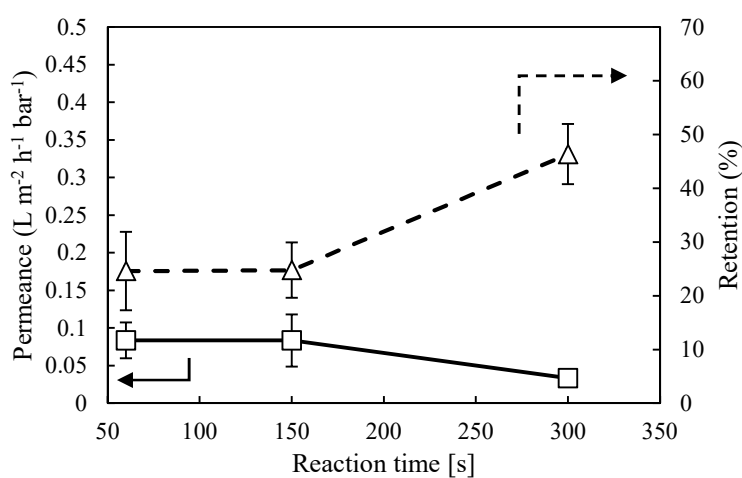

**Figure S4.** Milli-Q water/EtOH permeance and EA retention of membranes synthesized with 17.5 wt% H<sub>2</sub>O in Aliquat.

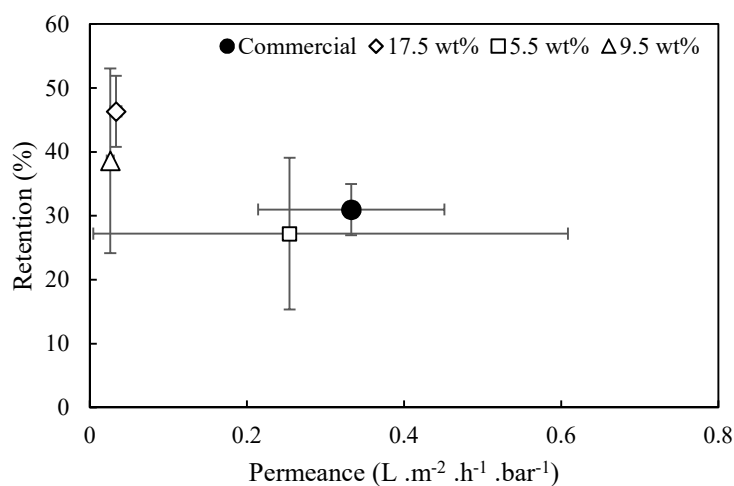

**Figure S5.** Water/EtOH permeance and EA retention of membranes synthesized with 300 s reaction time and different water concentrations in Aliquat (BASF).

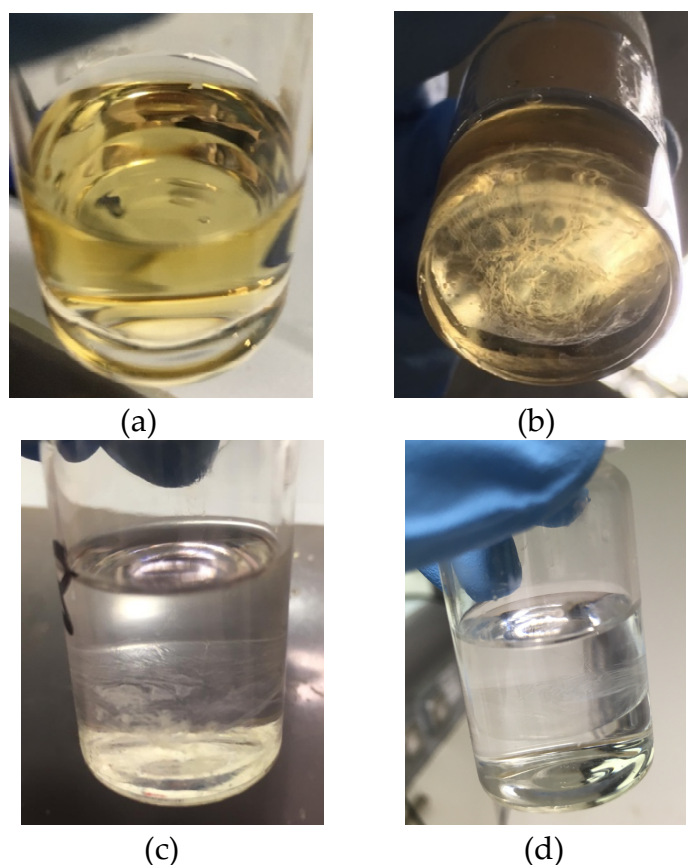

**Figure S6.** Visual determination of creation of PA film using (a) 0.1 wt% TMC in 17.5 wt% H<sub>2</sub>O mixture with 0.3 w/v% MPD in MilliQ water, (b) 4.0 wt% TMC with 1.0 w/v% MPD in MilliQ water after 3 min reaction time, (c) 0.1 wt% TMC in hexane and 2.0 w/v% MPD in MilliQ water, and (d) 1.5 wt% TMC and 0.3 w/v% MPD after less than 1 min reaction time.

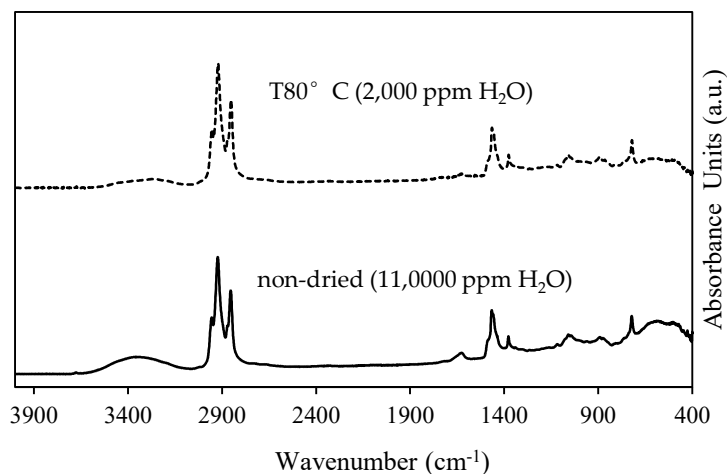

**Figure S7.** ATR-FTIR spectra of non-dried (full line), and vacuum-dried Aliquat at 80 °C (dotted line).

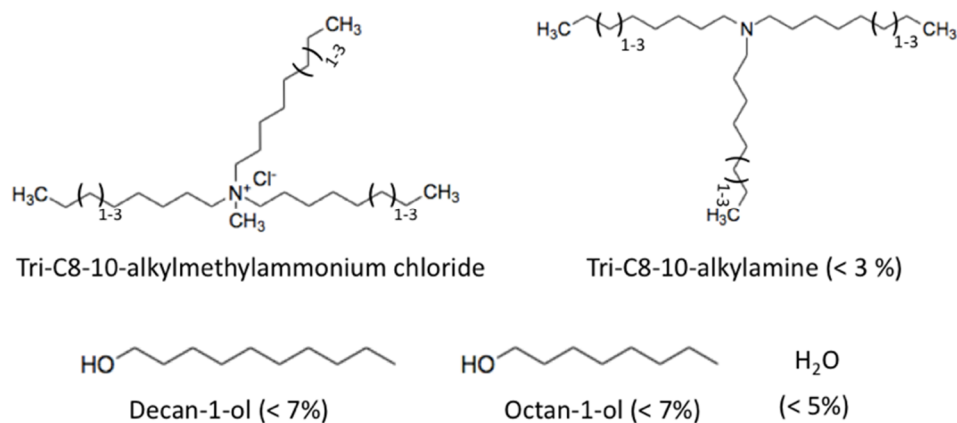

**Figure S8.** Chemical composition of all components present in Aliquat 336, as received from the supplier (BASF).

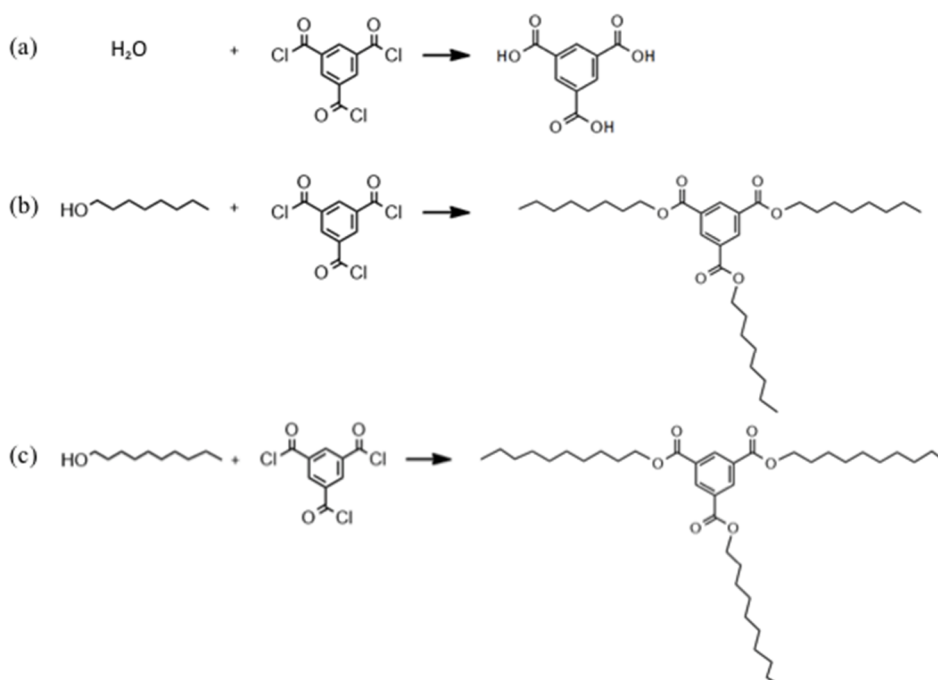

**Figure S9.** (a) hydrolysis of TMC with water, (b) esterification of TMC with octanol and (c) decanol.



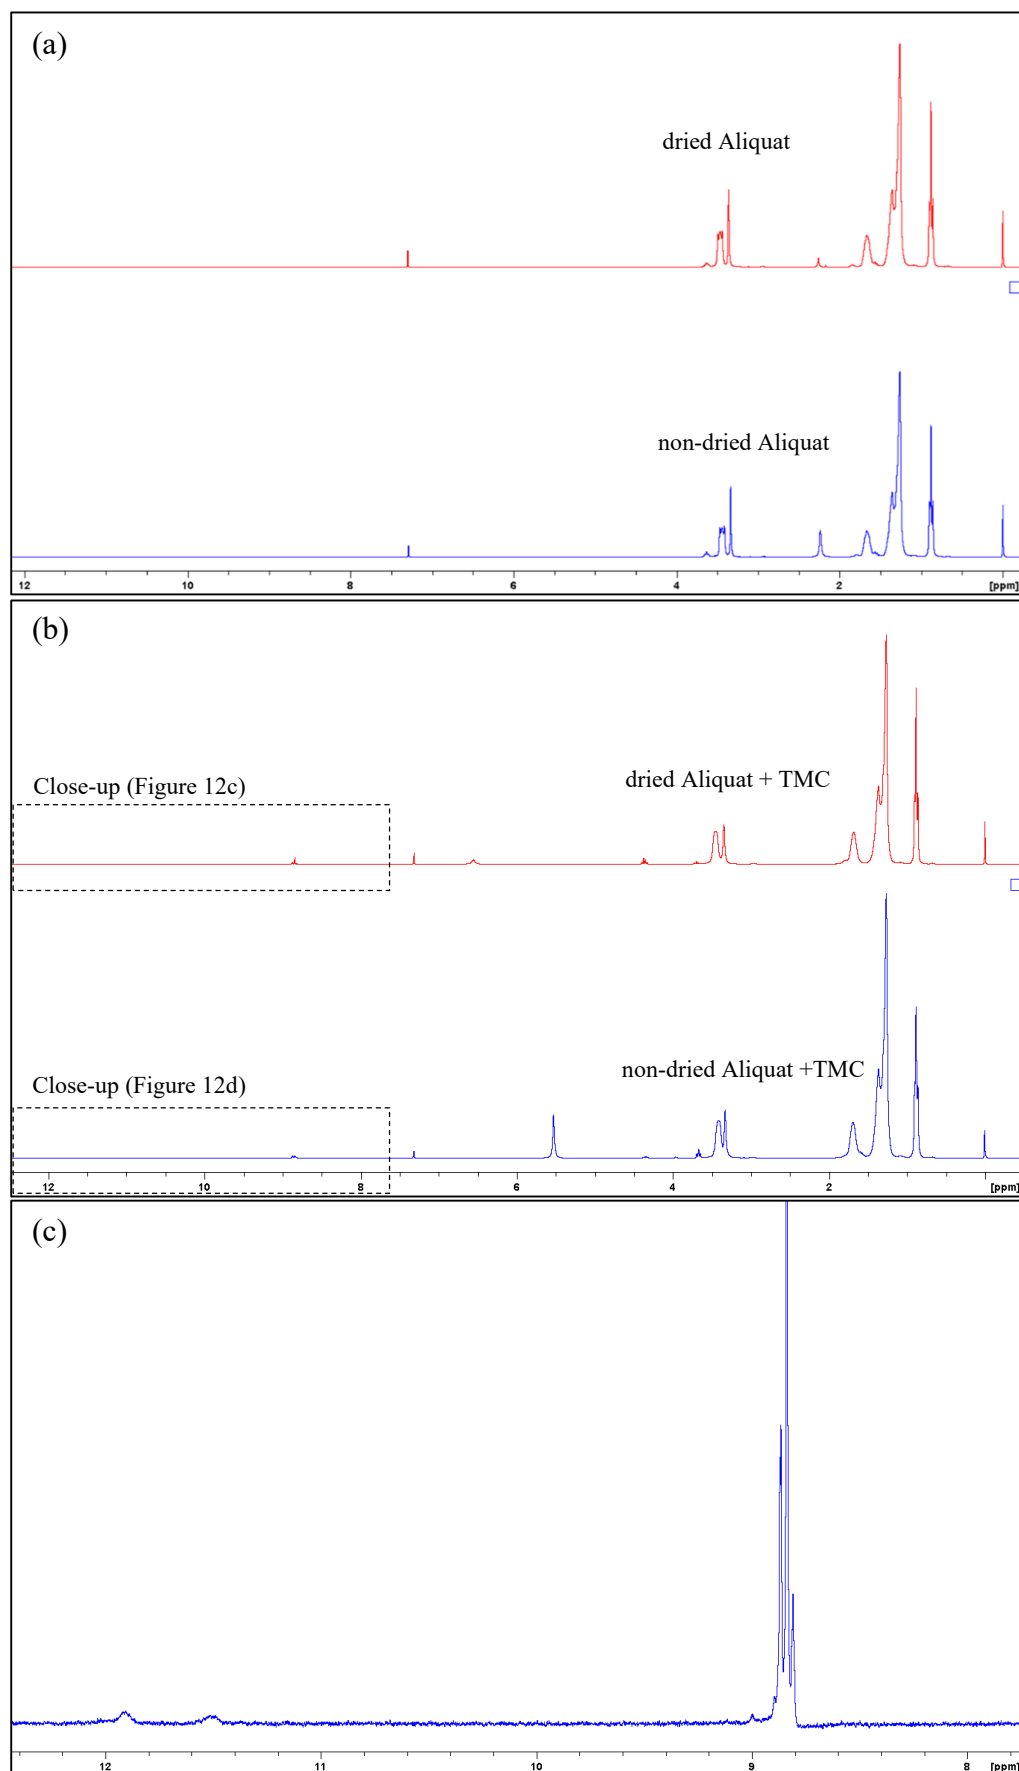

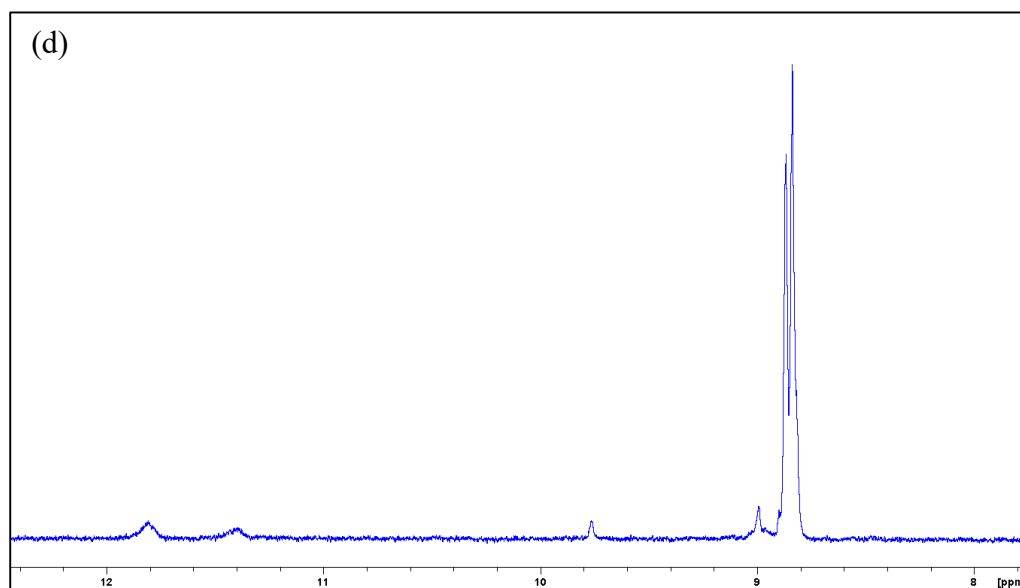

**Figure S10.** 300 MHz  $^1\text{H}$ -NMR spectra of (a) non-dried Aliquat (blue) and vacuum-dried at 80 °C (red), (b) 1.5 wt% TMC in dried (red) and non-dried (blue) Aliquat, (c) a close up of 1.5 wt% TMC in dried Aliquat and (d) a close up of 1.5 wt% TMC in non-dried Aliquat, in  $\text{CDCl}_3$ . On the x-axis, the chemical shift (ppm) is displayed.

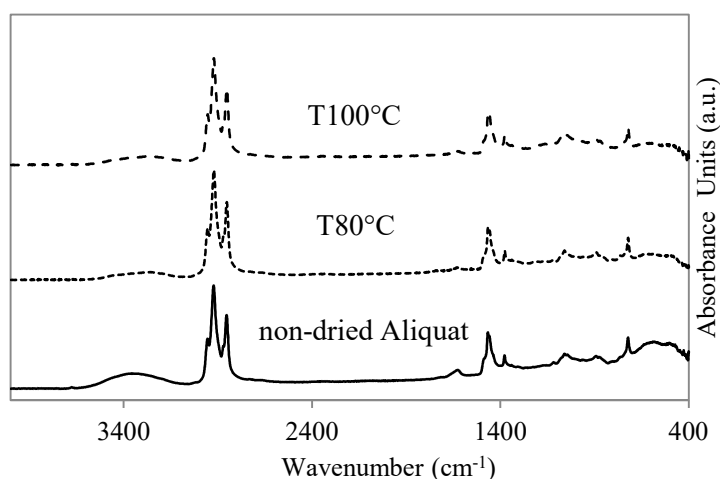

**Figure S11.** ATR-FTIR of Aliquat from bottle (full line), vacuum-dried at 80 °C (dotted line) and at 100 °C (striped line).

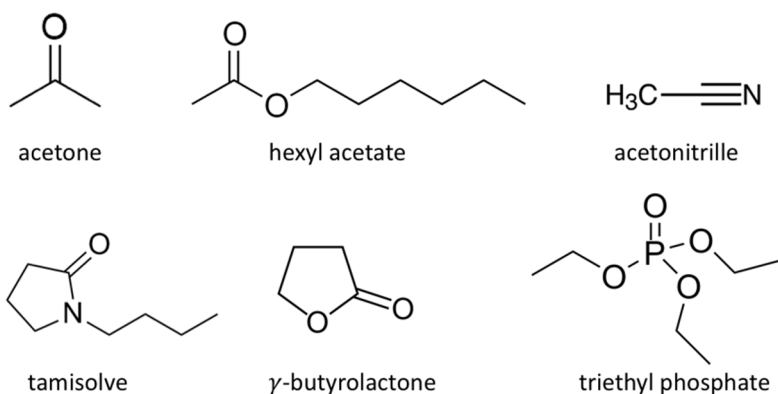

**Figure S12.** Structures of co-solvents.

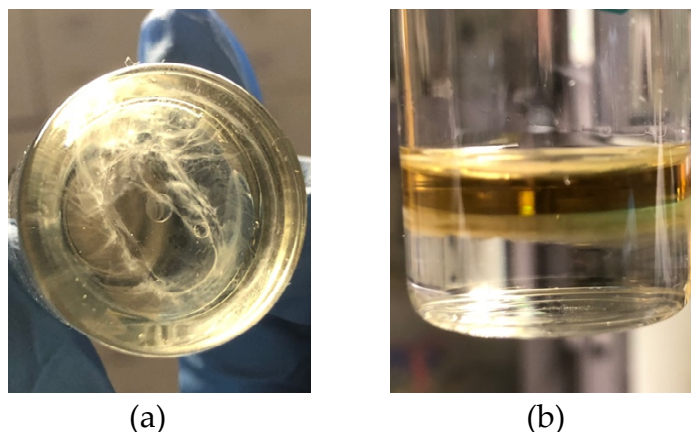

**Figure S13.** Determination of cloudy structure when using 0.3 w/v% MPD in MilliQ water with 1.5 wt% TMC in (a)  $\gamma$ -butyrolacton, and (b) acetonitrile as co-solvents.

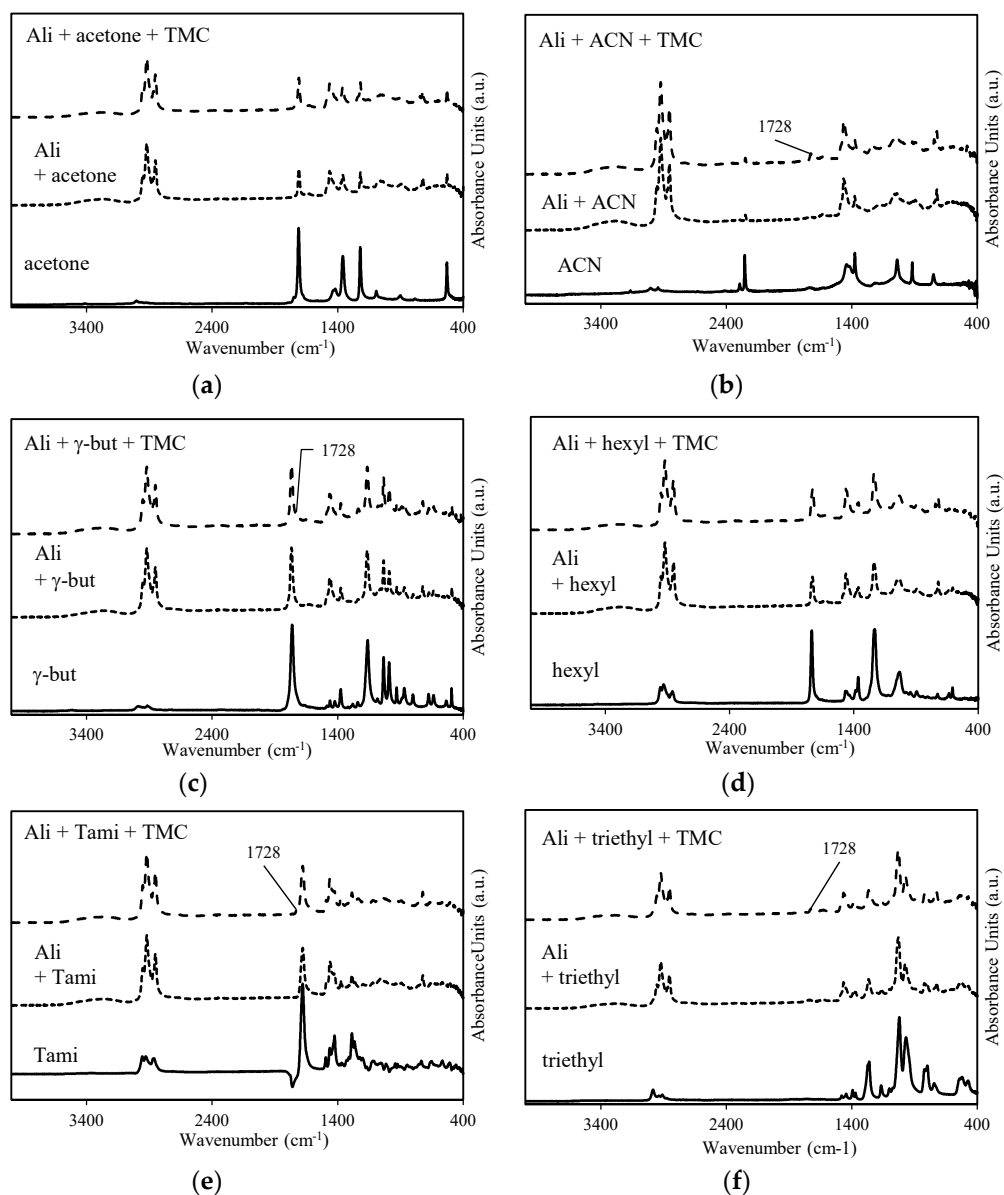

**Figure S14.** ATR-FTIR spectra of dried ( $100^{\circ}\text{C}$ ) Aliquat when 17.5 wt% co-solvents and/or 1.5 wt% TMC was added. ATR-FTIR spectra of pure co-solvent (full line), Aliquat (Ali) + co-solvent (dotted

line) and Aliquat + co-solvent + TMC (striped line) for co-solvents (a) acetone, (b) acetonitrile (ACN), (c)  $\gamma$ -butyrolactone ( $\gamma$ -but), (d) hexyl acetate (hexyl), (e) Tamisolve® (Tami) and (f) triethyl phosphate (triethyl).

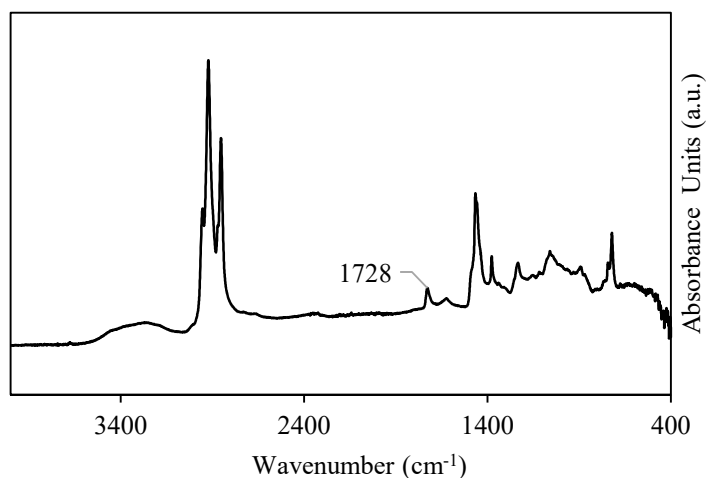

**Figure S15.** ATR FTIR spectrum of vacuum-dried Aliquat at 100 °C when 1.5 wt% TMC was added. An absorption band was observed at 1728 cm<sup>-1</sup>, indicating hydrolysis and/or esterification of TMC.

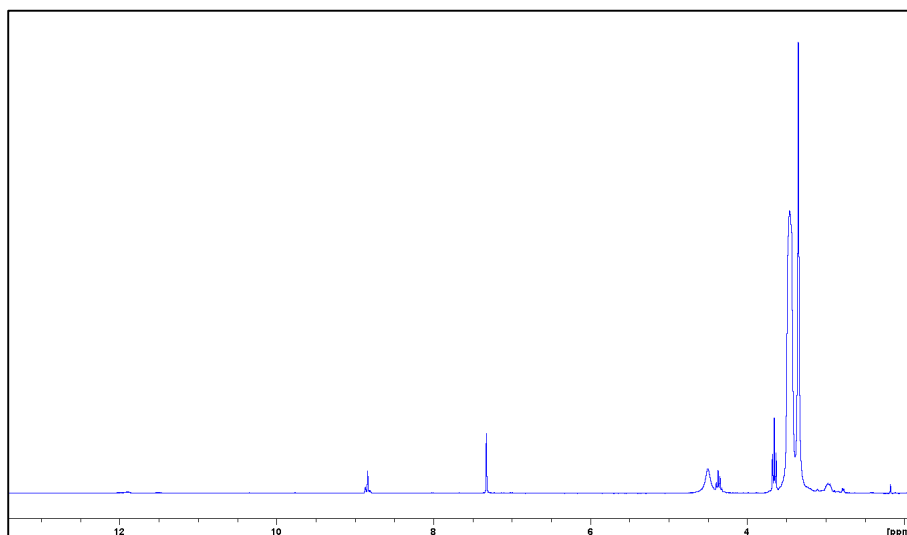

**Figure S16.** The 300 MHz <sup>1</sup>H-NMR spectra of vacuum dried Aliquat 336 at 100°C with 1.5 wt% TMC. On the x-axis, the chemical shift (in ppm) is displayed.

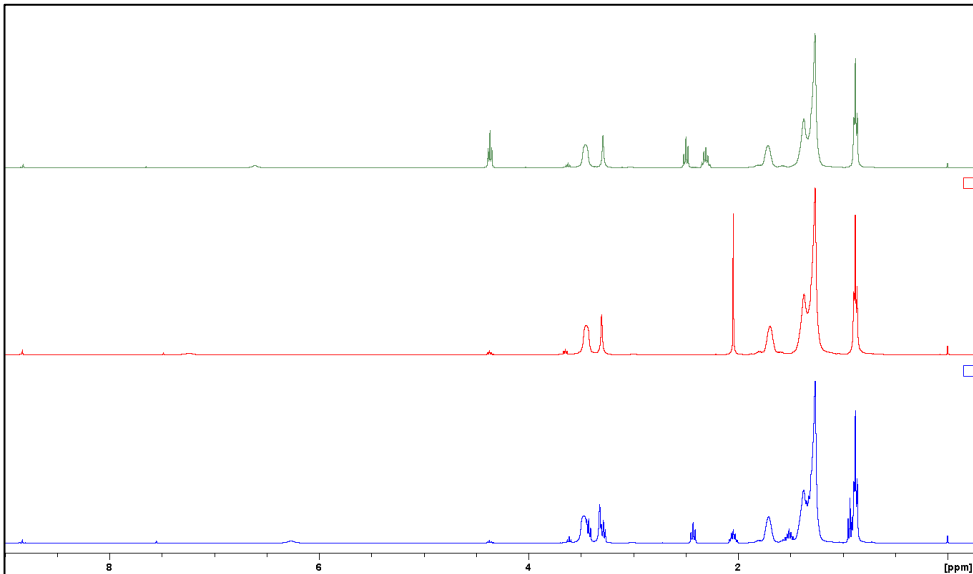

**Figure S17.** The 300 MHz  $^1\text{H}$ -NMR spectra of 1.5 wt% TMC in vacuum dried Aliquat 336 at 100°C for 48h with 17.5 wt%  $\gamma$ -butyrolactone (green), acetonitrile (red) and Tamisolve® (blue).

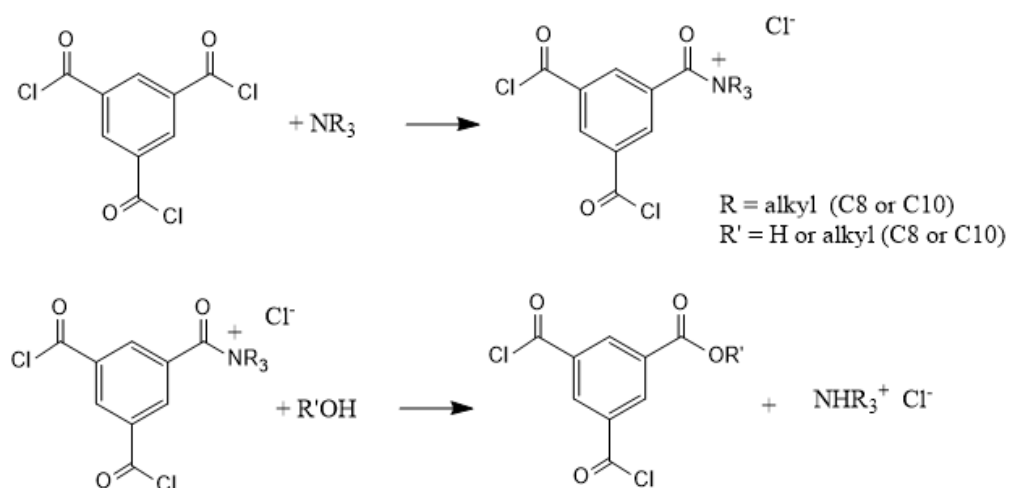

**Figure S18.** Possible reaction mechanisms of catalyzed hydrolysis ( $R' = H$ ) and esterification ( $R' = \text{alkyl}$ ) of TMC.

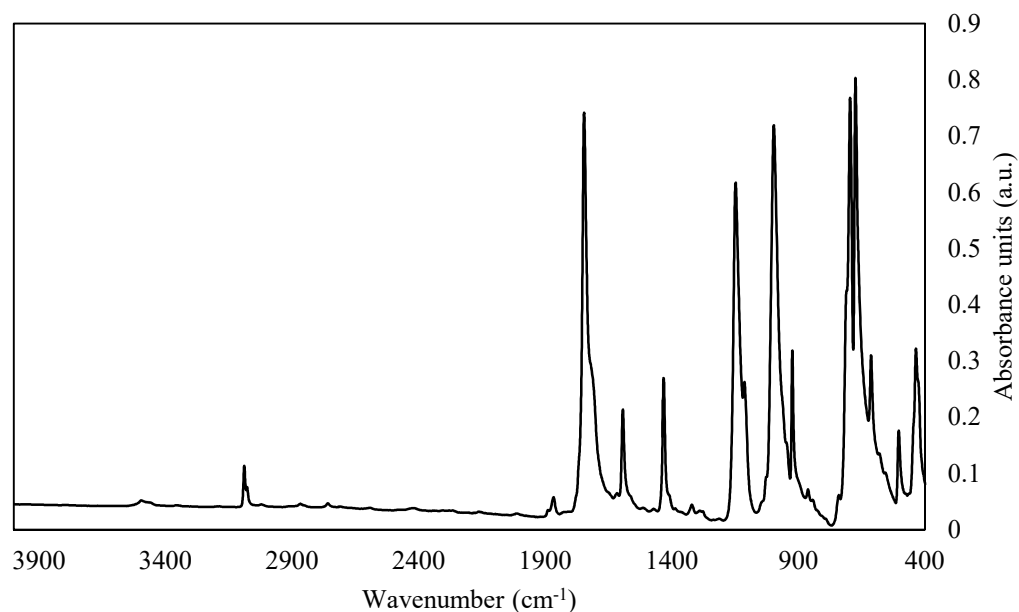

**Figure S19.** ATR-FTIR spectra of TMC in H<sub>2</sub>O stirred for 1h.

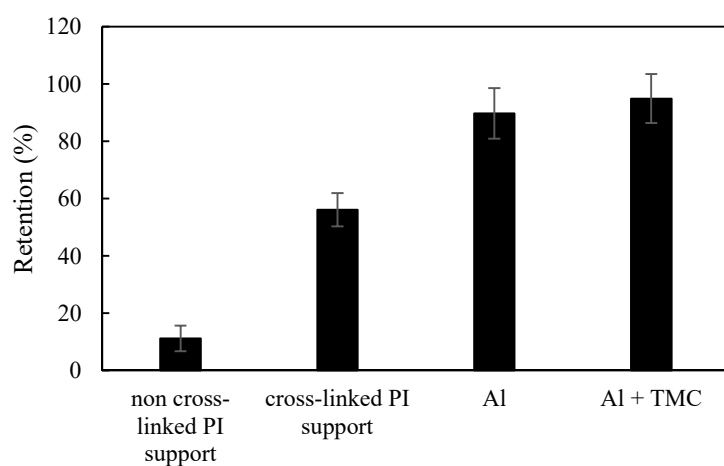

**Figure S20.** RB retentions of membranes with PI support, XL-PI support, Aliquat and Aliquat + 1.5 wt% TMC on XL-PI support.

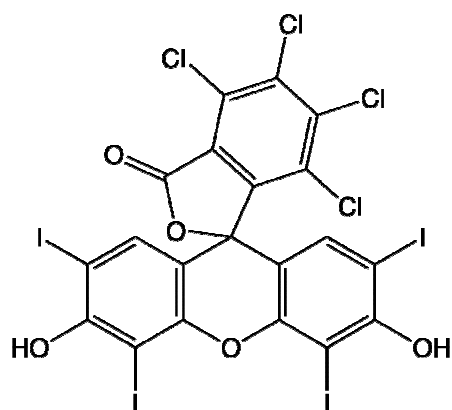

**Figure S21.** Structure of Rose Bengal.

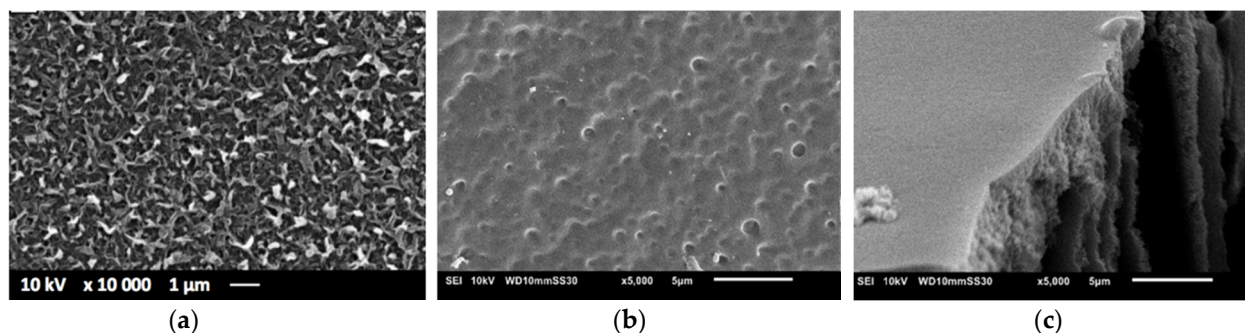

**Figure S22.** Surface SEM images of (a) typical ridge-and-valley morphology of an aromatic PA top-layer obtained with the conventional system (i.e. with hexane), (b) 1.51 wt% H<sub>2</sub>O and (c) 21.3 wt% H<sub>2</sub>O in Aliquat.

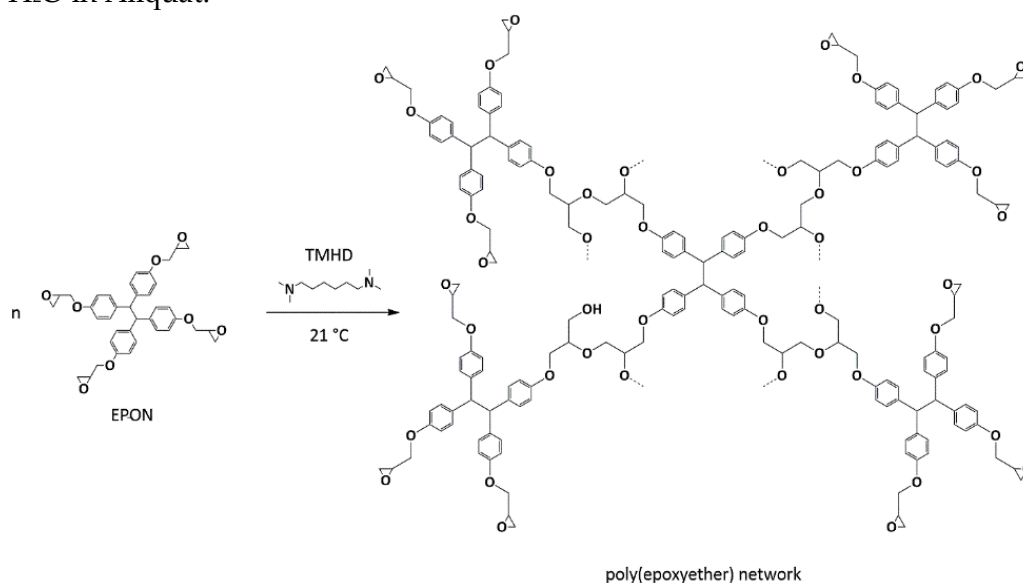

**Figure S23.** Anionic ring opening polymerization of EPON with TMHD (Adapted from [5]).

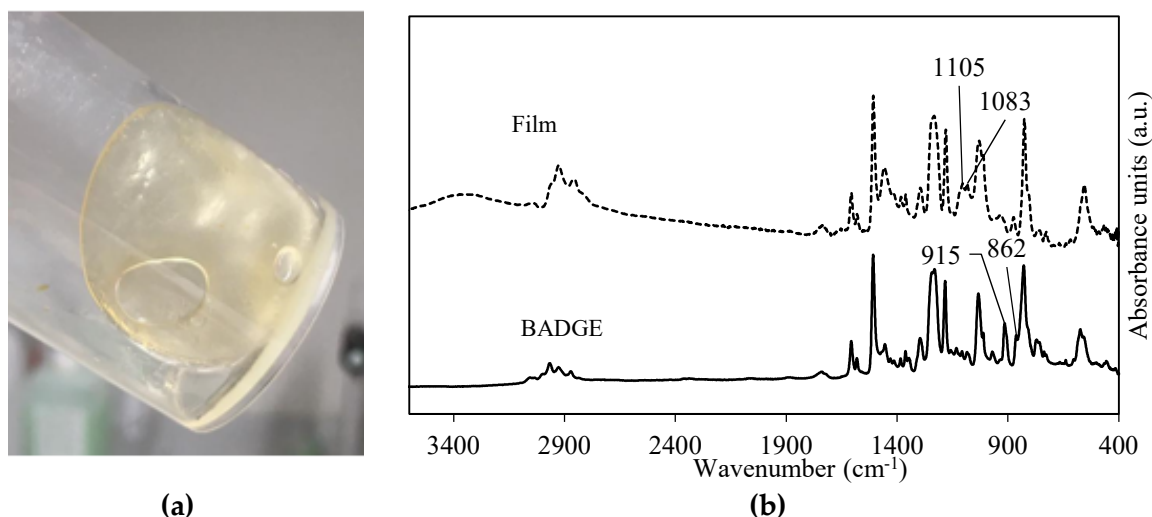

**Figure S24.** (a) Successful isolation of a poly( $\beta$ -alkanamine) film. (b) ATR-FTIR spectra of isolated poly( $\beta$ -alkanamine) film (dotted line) and pure BADGE (full line).

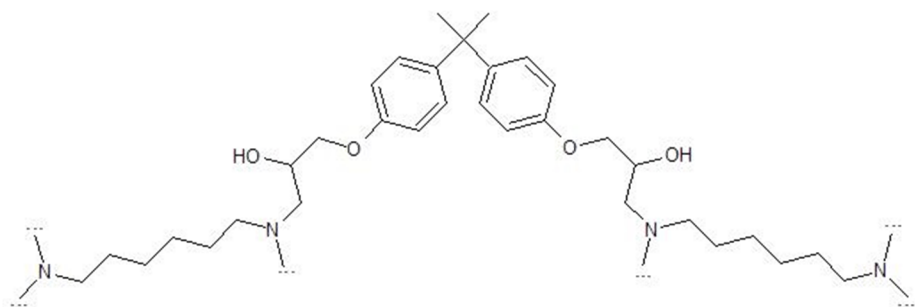

**Figure S25.** Structure of poly( $\beta$ -alkanolamine).

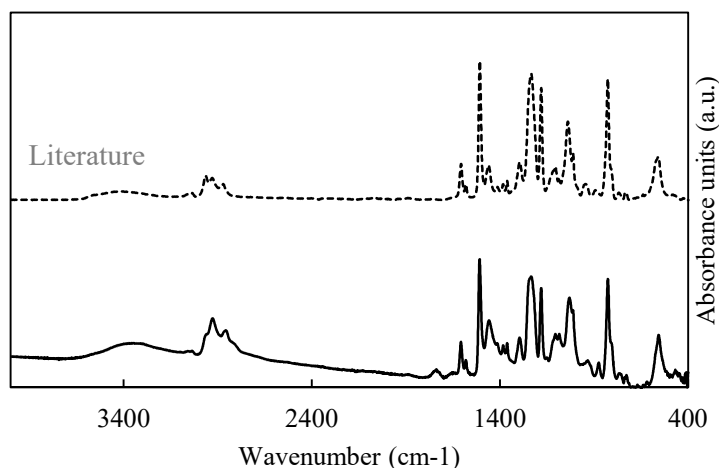

**Figure S26.** ATR-FTIR spectrum of the obtained poly( $\beta$ -alkanolamine) film (full line) and literature data (dotted line) (adapted from [6]).

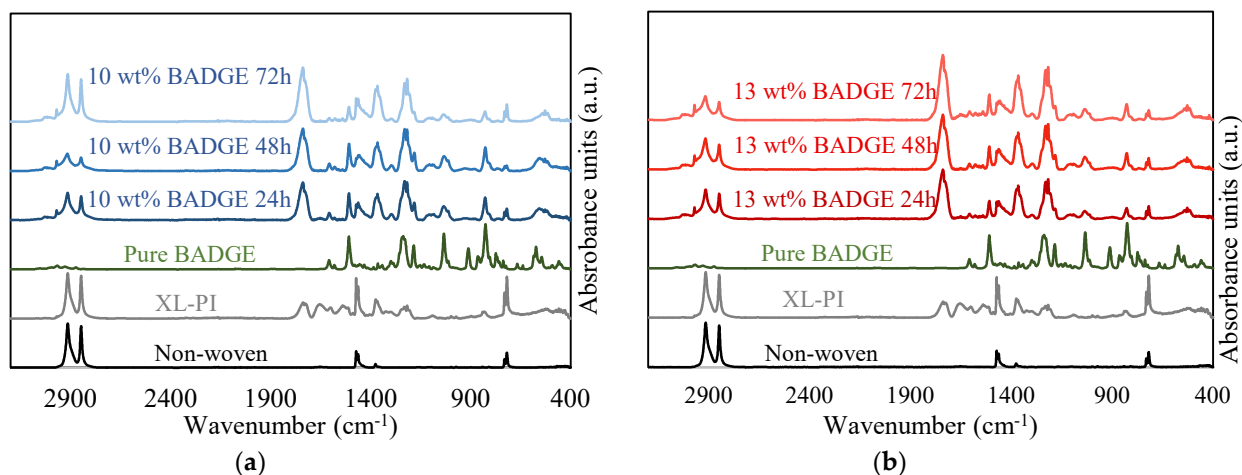

**Figure S27.** ATR-FTIR spectra for (a) 10 wt% HDA in water with 10 wt% BADGE in Aliquat and (b) 13 wt% HDA with 13 wt% E2.



**Table S1.** Prices of ILs.

|                                          | Price (€ per 100g) <sup>a</sup> |
|------------------------------------------|---------------------------------|
| [C <sub>4</sub> mim][Tf <sub>2</sub> N]  | 226                             |
| [C <sub>4</sub> mpyr][Tf <sub>2</sub> N] | 115                             |
| Aliquat                                  | 16                              |

<sup>a</sup> For lab quantities**Table S2.** Water content in dried co-solvents and Aliquat/co-solvent mixtures.

| Co-solvents and their mixtures with Aliquat | Water concentration before drying (ppm) | Water concentration after drying (ppm) |
|---------------------------------------------|-----------------------------------------|----------------------------------------|
| Hexyl acetate                               | 294                                     | /                                      |
| Aliquat + hexyl acetate                     | /                                       | 1521                                   |
| Tamisolve®                                  | 1365                                    | /                                      |
| Aliquat + Tamisolve®                        | /                                       | 419                                    |
| Triethyl phosphate                          | 1132                                    | /                                      |
| Aliquat + triethyl phosphate                | /                                       | NA                                     |
| Acetonitrille                               | 149                                     | /                                      |
| Aliquat + acetonitrille                     | /                                       | 332                                    |
| γ-butyrolactone                             | 182                                     | /                                      |
| Aliquat + γ-butyrolactone                   | /                                       | 188                                    |

Note: No measurement of triethyl phosphate/Aliquat due to practical infeasible (high viscosity).

**Table S3.** Preliminary screening of poly(β-alkanolamine) film formation for three different concentrations of HDA and BADGE.

| Vial | Concentration                 | 1 month at RT |
|------|-------------------------------|---------------|
| 1    | 2 wt% HDA<br>+ 0.1 wt% BADGE  | -             |
| 2    | 10 wt% HDA<br>+ 0.5 wt% BADGE | -             |
| 3    | 10 wt% HDA<br>+ 10 wt% BADGE  | -             |

**Table S4.** Vial tests for different concentrations of E2 and HDA.

| Concentration  | Reaction conditions (T & reaction time) | Images                                                                              |
|----------------|-----------------------------------------|-------------------------------------------------------------------------------------|
| 7 wt% E2 & HDA | RT, 20 h                                | 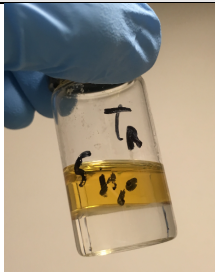 |

|                 |             |                                                                                      |  |
|-----------------|-------------|--------------------------------------------------------------------------------------|--|
|                 | RT, 80 h    | 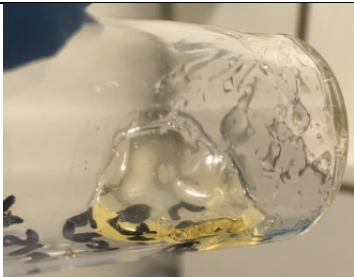   |  |
| 10 wt% E2 & HDA | RT, 20 h    |     |  |
|                 | 80 °C, 20 h |   |  |
|                 | RT, 80h     |   |  |
| 13 wt% E2 & HDA | RT, 20h     |   |  |
|                 | 80 °C, 20h  |  |  |

|                 |            |                                                                                      |  |
|-----------------|------------|--------------------------------------------------------------------------------------|--|
|                 | RT, 80h    | 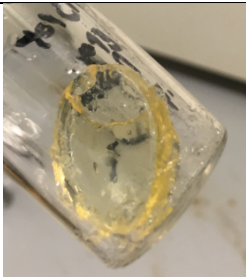    |  |
| 16 wt% E2 & HDA | RT, 20h    |    |  |
|                 | 80 °C, 20h |   |  |
|                 | RT, 80h    |  |  |

**Table S5.** Vial tests for different concentrations of E8 and HDA.

| Concentration  | Reaction condition (T & reaction time) | Images                                                                               |
|----------------|----------------------------------------|--------------------------------------------------------------------------------------|
| 2 wt% E8 & HDA | RT, 1 h                                |     |
|                | RT, 20 h                               |    |
|                | 80 °C, 20 h                            |    |
| 4 wt% E8 & HDA | RT, 1 h                                |  |
|                | 80 °C, 1 h                             |   |

|  |             |                                                                                    |
|--|-------------|------------------------------------------------------------------------------------|
|  | RT, 20 h    | 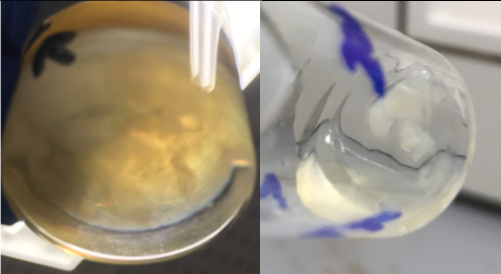 |
|  | 80 °C, 20 h |  |

## References

1. Hermans, S.; Mariën, H.; Dom, E.; Bernstein, R.; Vankelecom, I.F. Simplified synthesis route for interfacially polymerized polyamide membranes. *J. Membr. Sci.* **2014**, *451*, 148–156, doi:10.1016/j.memsci.2013.10.005.
2. Hermans, S.; Mariën, H.; Van Goethem, C.; Vankelecom, I.F. Recent developments in thin film (nano)composite membranes for solvent resistant nanofiltration. *Curr. Opin. Chem. Eng.* **2015**, *8*, 45–54, doi:10.1016/j.coche.2015.01.009.
3. Vanherck, K.; Cano-Odena, A.; Koeckelberghs, G.; Dedroog, T.; Vankelecom, I. A simplified diamine crosslinking method for PI nanofiltration membranes. *J. Membr. Sci.* **2010**, *353*, 135–143, doi:10.1016/j.memsci.2010.02.046.
4. Mariën, H.; Vankelecom, I.F. Optimization of the ionic liquid-based interfacial polymerization system for the preparation of high-performance, low-fouling RO membranes. *J. Membr. Sci.* **2018**, *556*, 342–351, doi:10.1016/j.memsci.2018.03.071.
5. Verbeke, R.; Arts, W.; Dom, E.; Dickmann, M.; Egger, W.; Koeckelberghs, G.; Szymczyk, A.; Vankelecom, I.F. Transferring bulk chemistry to interfacial synthesis of TFC-membranes to create chemically robust poly(epoxyether) films. *J. Membr. Sci.* **2019**, *582*, 442–453, doi:10.1016/j.memsci.2019.02.016.
6. Cabanelas, J.C.; Baselga, J. Applications of FTIR on Epoxy Resins - Identification, Monitoring the Curing Process, Phase Separation and Water Uptake. In *Infrared Spectroscopy - Materials Science, Engineering and Technology*; InTech, 2012.
